# Supplementary material
Source: Springer Nature journal article supplement (https://www.springermedizin.de/resource/supplementary/12990_2007_93_MOESM2_ESM.pdf/9612552)

### Single-Dose Tolerance Effect of Dose Interval

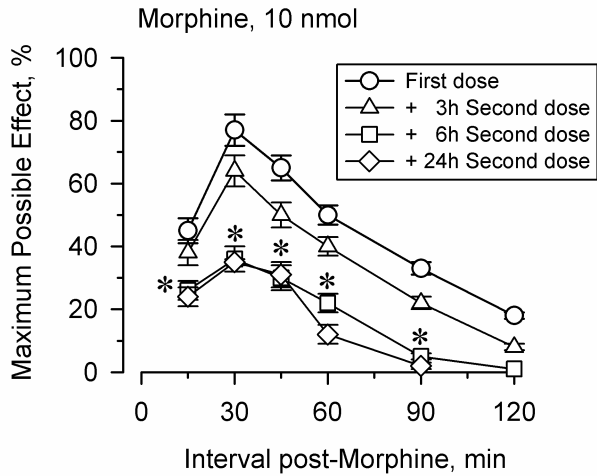

### Repeated administration of 10 nmol morphine

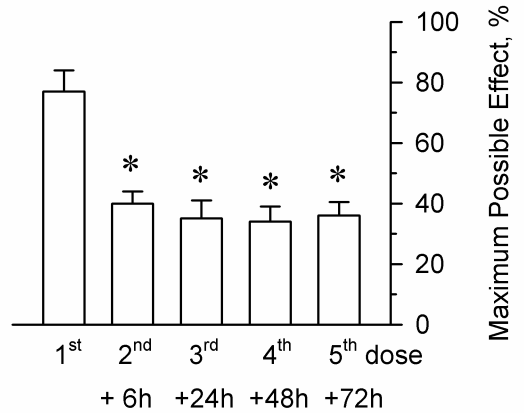

IP: MOR

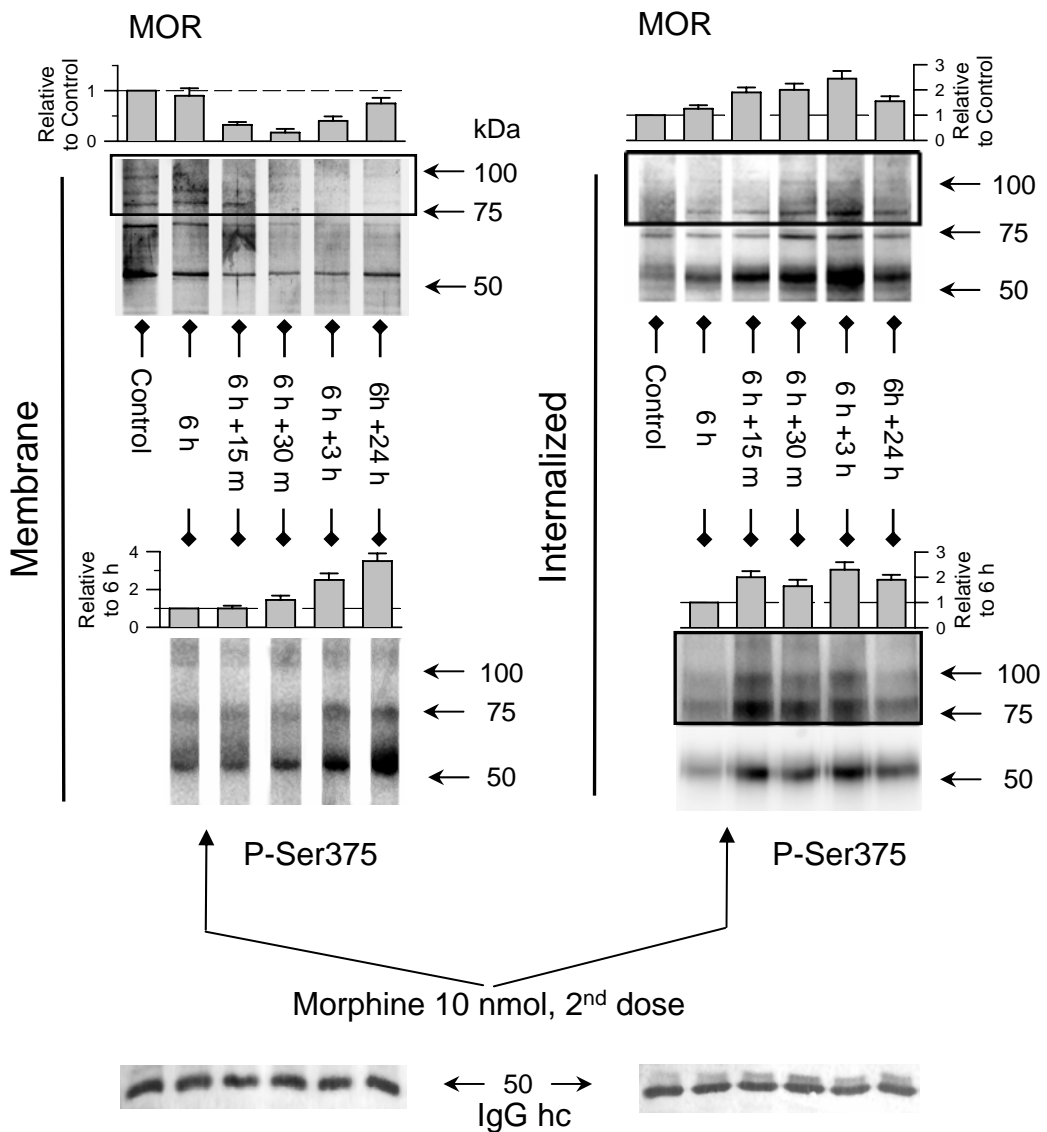

Supplement: MOESM2 [file 9612552]
